# Supplementary material for: A Latitudinal Diversity Gradient in Terrestrial Bacteria of the Genus Streptomyces
Source: PubMed Central journal article supplement (PMC4817263; doi:10.1128/mbio.02200-15), 2016-04-05
Supplement: mbo002162750sf1.pdf [file mbo002162750sf1.pdf]

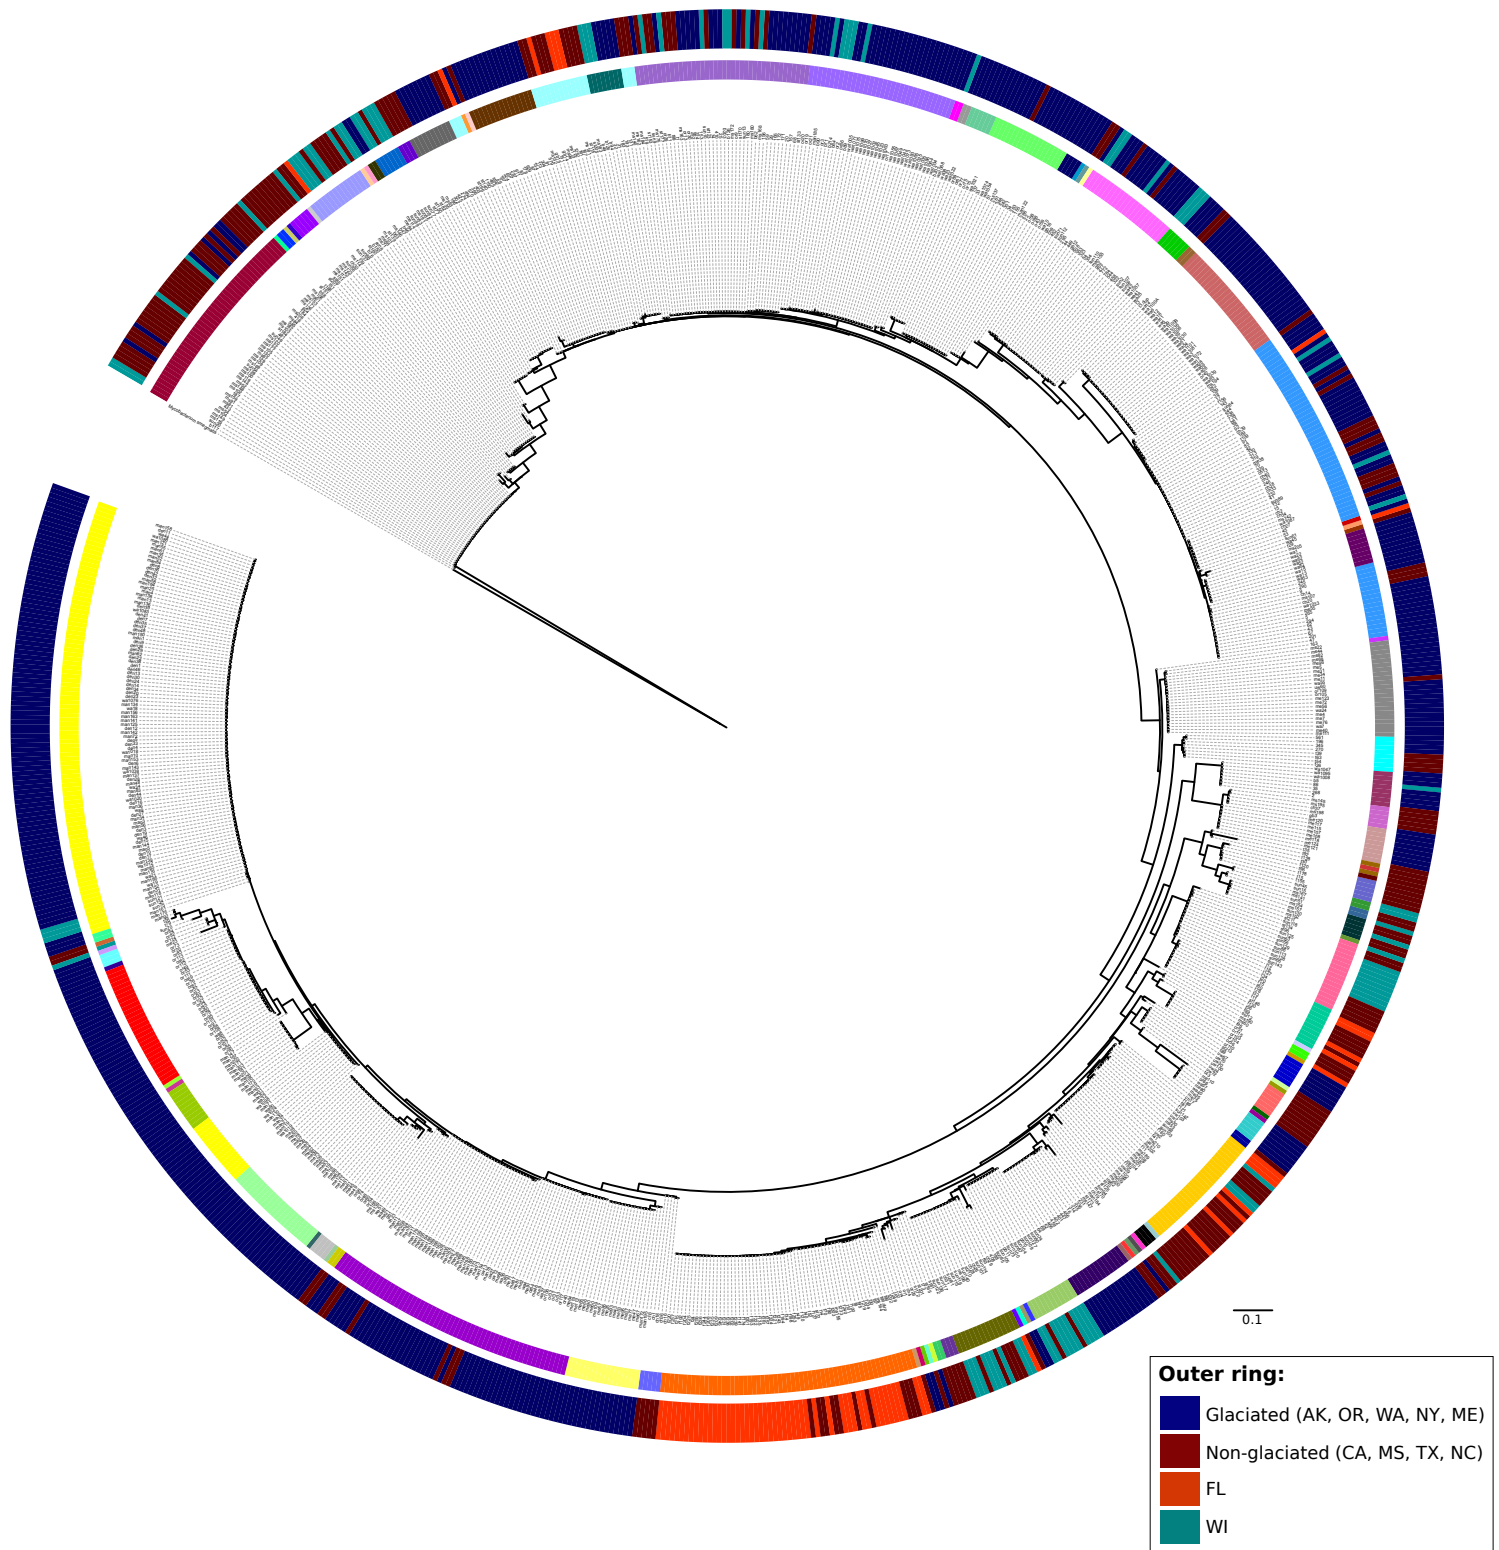

**Figure S1.** Maximum likelihood tree based on *rpoB* sequences of *Streptomyces* strains. A total of 924 *Streptomyces* strains were isolated from 15 sites in North America and classified into 107 OTU on the basis of *rpoB* sequence dissimilarity. The inner colored ring uses sequential color blocks to indicate the 107 OTU<sub>*rpoB*</sub> identified in this study. The outer color ring identifies the history of the site from which each strain was isolated as indicated in the color scale (FL and WI are indicated as well due to their distinctive geological history). The site from which each strain was isolated can be determined by the strain name as described in Table S1.
