# Supplementary material for: A Latitudinal Diversity Gradient in Terrestrial Bacteria of the Genus Streptomyces
Source: PubMed Central journal article supplement (PMC4817263; doi:10.1128/mbio.02200-15), 2016-04-05
Supplement: mbo002162750sf2.pdf [file mbo002162750sf2.pdf]

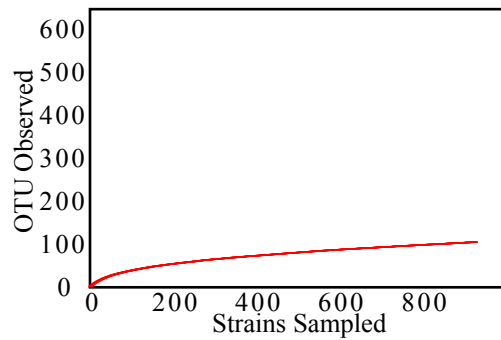

**Figure S2.** The rarefied collectors curve indicates that OTU<sub>*rpoB*</sub> have been well sampled from the sampling sites (with respect to the constraints imposed by strain collection). Good's coverage is 0.88 for unique *rpoB* sequences and 0.95 for OTU<sub>*rpoB*</sub>.
