# Supplementary material for: A Latitudinal Diversity Gradient in Terrestrial Bacteria of the Genus Streptomyces
Source: PubMed Central journal article supplement (PMC4817263; doi:10.1128/mbio.02200-15), 2016-04-05
Supplement: mbo002162750st1.pdf [file mbo002162750st1.pdf]

**Table S1.** *Streptomyces* strains were isolated and characterized from a series of 15 sites as described. In the case of WI and NC, samples were aggregated across two or three soil samples respectively to represent each region. Abbreviations are: phylogenetic diversity (PD), net relatedness index (NRI), time available for colonization (Time), millions of years ago (mya), soil organic matter (SOM), average (ave.). Asterisks are used to identify values of NRI that show clustering (positive) or over dispersion (negative) that are unlikely to result from a chance ( $p < 0.01$ ).

| Site | Sampling ID    | Strain number | OTU obs. | Lat. (°N) | Long. (-°W) | PD   | NRI    | MRD  | Time (mya) | Rank age | Soil pH | Ave. annual temp. (°C) | SOM (%) | Ave. annual precip. (cm) | Strain names |
|------|----------------|---------------|----------|-----------|-------------|------|--------|------|------------|----------|---------|------------------------|---------|--------------------------|--------------|
| WI   | Aggregate      | 87            | 20       | 43.11     | 88.69       | 3.15 | -3.05* | 20.3 | 500        | 1        | 6.65    | 7.85                   | 7.70    | 90.3                     |              |
|      | Sun Prairie    | 65            | n.d.     | 43.17     | 89.24       | n.d. | n.d.   | n.d. | n.d.       | n.d.     | 6.59    | 8.37                   | 6.13    | 92.5                     | sun          |
|      | Brookfield     | 22            | n.d.     | 43.06     | 88.13       | n.d. | n.d.   | n.d. | n.d.       | n.d.     | 6.79    | 7.33                   | 9.26    | 88.0                     | b            |
| NC   | Aggregate      | 55            | 15       | 36.87     | 79.34       | 2.30 | 2.04   | 24.4 | 300        | 2        | 6.40    | 15.54                  | 5.72    | 111.9                    |              |
|      | Charlotte      | 27            | n.d.     | 38.81     | 78.26       | n.d. | n.d.   | n.d. | n.d.       | n.d.     | 6.40    | n.d.                   | n.d.    | n.d.                     | ch           |
|      | Uwharrie       | 19            | n.d.     | 35.71     | 79.88       | n.d. | n.d.   | n.d. | n.d.       | n.d.     | n.d.    | 15.54                  | 5.72    | 120.2                    | uw           |
|      | Greensboro     | 9             | n.d.     | 36.09     | 79.89       | n.d. | n.d.   | n.d. | n.d.       | n.d.     | n.d.    | n.d.                   | n.d.    | n.d.                     | gb           |
| MS   | Starkville     | 90            | 13       | 33.461    | 88.8        | 3.08 | -3.63* | 20.6 | 80         | 3        | 6.82    | 17.16                  | 12.84   | 153.3                    | ms           |
| TX   | Austin         | 42            | 16       | 30.204    | 97.77       | 3.00 | -4.64* | 25.1 | 50         | 4        | 7.29    | 21.04                  | 8.14    | 86.7                     | t            |
| CA   | Palo Alto      | 34            | 20       | 37.429    | 122.17      | 2.48 | -2.08  | 18.3 | 3          | 5        | 7.11    | 14.46                  | 6.26    | 37.2                     | st           |
| FL   | Fort Pierce    | 70            | 6        | 27.54     | 80.35       | 1.93 | 8.57*  | 23.8 | 0.118      | 6        | 7.09    | 22.87                  | 5.64    | 124.7                    | f            |
| NY   | Ithaca         | 142           | 11       | 42.45     | 76.46       | 2.42 | 7.04*  | 21.2 | 0.018      | 7        | 5.20    | 8.17                   | 3.49    | 99.8                     | # only       |
| ME   | Kennebunk      | 85            | 10       | 43.401    | 70.54       | 2.45 | 4.02*  | 24.5 | 0.018      | 8        | 4.76    | 7.14                   | 5.74    | 139.8                    | me           |
| WA   | Bothell        | 105           | 9        | 47.731    | 122.24      | 1.95 | 9.82*  | 25.9 | 0.014      | 9        | 5.31    | 11.36                  | 11.34   | 83.1                     | wa           |
| OR   | Astoria        | 79            | 13       | 46.18     | 123.85      | 2.53 | 4.12*  | 27.3 | 0.013      | 10       | 3.90    | 10.81                  | 8.23    | 163.5                    | or           |
| AK1  | Denali         | 40            | 1        | 63.22     | 147.68      | 0.58 | 12.67* | 30   | 0.013      | 11       | 6.00    | -3.58                  | 1.89    | 61.3                     | den          |
| AK2  | Manley Springs | 95            | 5        | 63.87     | 149.02      | 1.52 | 16.64* | 27.4 | 0.013      | 12       | 6.00    | -3.92                  | 9.96    | 58.2                     | man          |
