# Supplementary material for: A Latitudinal Diversity Gradient in Terrestrial Bacteria of the Genus Streptomyces
Source: PubMed Central journal article supplement (PMC4817263; doi:10.1128/mbio.02200-15), 2016-04-05
Supplement: mbo002162750st2.pdf [file mbo002162750st2.pdf]

**Table S2.** Results from Table 2 are represented alongside results obtained when sites from Alaska are excluded. The column ‘sites’ indicates results obtained when Alaska sites are included (+AK, these rows are the same as those depicted in Table 2) or excluded (-AK). Results that provide different outcomes between the +AK and -AK analyses are indicated with shading. Relationships between environmental factors and *Streptomyces* phylogenetic (UniFrac distance) and taxonomic (Bray-Curtis dissimilarity) dissimilarity were analyzed by ADONIS (permutational multivariate analysis of variance). Values indicate R<sup>2</sup> and results that are unlikely due to chance are indicated with asterisks (\*,  $p < 0.05$ ; \*\*,  $p < 0.01$ ; \*\*\*,  $p < 0.001$ ). The analyses were performed by either including all *rpoB* sequences (weighted) or excluding duplicate sequences for each OTU (un-weighted).

| Analysis    | Sequence Weighting | Sites | Latitude | Soil pH | Average SOM temp. | SOM  | Annual precip. |
|-------------|--------------------|-------|----------|---------|-------------------|------|----------------|
| UniFrac     | weighted           | +AK   | 0.52**   | 0.35    | 0.50**            | 0.26 | 0.28           |
|             |                    | -AK   | 0.38     | 0.43    | 0.35              | 0.33 | 0.25           |
|             | un-weighted        | +AK   | 0.48***  | 0.41*   | 0.44**            | 0.32 | 0.34           |
|             |                    | -AK   | 0.48*    | 0.51**  | 0.38              | 0.32 | 0.35           |
| Bray-Curtis | weighted           | +AK   | 0.46***  | 0.40*   | 0.44**            | 0.21 | 0.33           |
|             |                    | -AK   | 0.44***  | 0.44**  | 0.41*             | 0.29 | 0.32           |
|             | un-weighted        | +AK   | 0.46***  | 0.44**  | 0.44**            | 0.25 | 0.31           |
|             |                    | -AK   | 0.48**   | 0.51**  | 0.42              | 0.24 | 0.33           |
