# Supplementary material for: A Latitudinal Diversity Gradient in Terrestrial Bacteria of the Genus Streptomyces
Source: PubMed Central journal article supplement (PMC4817263; doi:10.1128/mbio.02200-15), 2016-04-05
Supplement: mbo002162750st3.pdf [file mbo002162750st3.pdf]

**Table S2.** Significant inferences from nested clade analysis (Figure S3) of *Streptomyces rpoB* haplotypes.

| <b>Clade</b> | <b>Inference</b>                                                                        |
|--------------|-----------------------------------------------------------------------------------------|
| 1-2          | Contiguous range expansion                                                              |
| 1-20         | Contiguous range expansion                                                              |
| 1-72         | Contiguous range expansion                                                              |
| 1-73         | Contiguous range expansion                                                              |
| 1-75         | Restricted dispersal by distance                                                        |
| 2-5          | Restricted dispersal by distance                                                        |
| 2-65         | Restricted dispersal by distance                                                        |
| 2-70         | Allopatric fragmentation                                                                |
| 2-78         | Allopatric fragmentation                                                                |
| 2-100        | Allopatric fragmentation                                                                |
| 2-119        | Allopatric fragmentation                                                                |
| 2-121        | Allopatric fragmentation                                                                |
| 3-69         | Restricted dispersal by distance                                                        |
| 3-74         | Insufficient resolution to distinguish between range expansion and restricted dispersal |
| 4-1          | Restricted dispersal by distance                                                        |
| 4-2          | Restricted dispersal by distance                                                        |
| 4-3          | Restricted dispersal by distance                                                        |
| 4-71         | Contiguous range expansion                                                              |
| 4-74         | Insufficient resolution to distinguish between range expansion and restricted dispersal |
| 4-75         | Insufficient resolution to distinguish between range expansion and restricted dispersal |
| 5-1          | Contiguous range expansion                                                              |
| 5-2          | Contiguous range expansion                                                              |
